# Supplementary material for: Microbial Consortia Involved in Traditional Sicilian Sourdough: Characterization of Lactic Acid Bacteria and Yeast Populations
Source: MDPI journal article supplement (doi:10.3390/microorganisms10020283), 2022-01-26
Supplement: s1 [file s1]

**Table S1.** Characteristics of the sourdough samples M1, M2, M3, and M4 collected from the four selected bakeries located in Sicily.

|                                          | M1      | M2      | M3      | M4      |
|------------------------------------------|---------|---------|---------|---------|
| Bakery location (city)                   | Maletto | Trapani | Palermo | Catania |
| Flour in chief sourdough                 | Maiorca | Maiorca | Maiorca | Maiorca |
| Hydration of sourdough (%)               | 87      | 75      | 82      | 73      |
| No. of back-slopping steps before use    | 1       | 1       | 1       | 1       |
| Temp (°C) of back-slopping <sup>a</sup>  | 22.5    | 21      | 23      | 22.6    |
| Period (h) of back-slopping <sup>a</sup> | 6h30    | 6h      | 11h     | 14h     |
| Sourdough <sup>b</sup> (%)               | 43      | 16      | 15.1    | 33      |
| Flour <sup>b</sup> (%)                   | 37      | 44      | 49.4    | 39.4    |
| Water <sup>b</sup> (%)                   | 19      | 38      | 35      | 27      |
| Salt <sup>b</sup> (%)                    | 0.9     | 1.3     | 0.8     | 0.8     |
| Kneading method <sup>c</sup>             | Me      | Me      | Ma      | Me      |
| Total period of fermentation             | 4h30    | 6h50    | 4h45    | 4h20    |

<sup>a</sup> Mature sourdough, after the last back-slopping

<sup>b</sup> Percentage of total dough weight

<sup>c</sup> Mechanically (Me) or manually (Ma)

<sup>d</sup> For the second bread-making run, only wheat flour was used

**Table S2.** Overview of the 16S rRNA gene ARDRA profiles and clustering data based on (GTG)<sub>5</sub> rep-PCR.

| Samples | Strains                                                      | 16S ARDRA analysis         |         | (GTG) <sub>5</sub> rep-PCR |               |
|---------|--------------------------------------------------------------|----------------------------|---------|----------------------------|---------------|
|         |                                                              | Restriction fragments (bp) | Pattern | Subcluster                 | Major cluster |
| M1      | <b>L7</b>                                                    | 313-305-246-110-100-90     | B       | S1                         | I             |
|         | <b>L84, L89</b>                                              | 313-305-246-110-100-90     | B       | S2                         | I             |
|         | <b>L82</b>                                                   | 313-305-246-110-100-90     | B       | Singleton                  | II            |
|         | <b>L83</b>                                                   | 313-305-246-110-100-90     | B       | Singleton                  | II            |
|         | <b>L92, L96, L97</b>                                         | 313-305-246-110-100-90     | B       | S3                         | II            |
|         | <b>L90</b>                                                   | 313-305-246-110-100-90     | B       | S4                         | III           |
|         | <b>L94</b>                                                   | 313-305-246-110-100-90     | B       | Singleton                  | III           |
|         | <b>L88</b>                                                   | 313-305-246-110-100-90     | B       | Singleton                  | III           |
|         | <b>L5, L6, L93</b>                                           | 510-240-110-105-90         | A       | S5                         | III           |
|         | <b>L4, L91, L95</b>                                          | 510-240-110-105-90         | A       | S7                         | III           |
|         | <b>L1, L2, L3</b>                                            | 510-240-110-105-90         | A       | S9                         | III           |
| M2      | <b>L10, L64, L69, L67, L77, L9, L11, L14, L8, L66</b>        | 510-240-110-105-90         | A       | S5                         | III           |
|         | <b>L74</b>                                                   | 510-240-110-105-90         | A       | S8                         | III           |
|         | <b>L12, L13</b>                                              | 510-240-110-105-90         | A       | S9                         | III           |
|         | <b>L65</b>                                                   | 510-240-110-105-90         | A       | S10                        | III           |
|         | <b>L68</b>                                                   | 510-240-110-105-90         | A       | Singleton                  | III           |
|         | <b>L79</b>                                                   | 510-240-110-105-90         | A       | Singleton                  | III           |
|         | <b>L73, L76, L78, L80, L72</b>                               | 313-305-246-110-100-90     | B       | S1                         | I             |
|         | <b>L15</b>                                                   | 313-305-246-110-100-90     | B       | Singleton                  | I             |
|         | <b>L75 L71</b>                                               | 313-305-246-110-100-90     | B       | S2                         | I             |
|         | <b>L81</b>                                                   | 310-310-220-212-115-90     | C       | Singleton                  | I             |
|         | <b>L70</b>                                                   | 313-305-246-110-100-90     | B       | Singleton                  | III           |
| M3      | <b>L50, L55, L56, L49, L52</b>                               | 313-305-246-110-100-90     | B       | S13                        | IV            |
|         | <b>L21, L22, L19, L20, L16, L17, L23</b>                     | 510-240-110-105-90         | A       | S5                         | III           |
|         | <b>L51</b>                                                   | 510-240-110-105-90         | A       | S7                         | III           |
|         | <b>L59</b>                                                   | 510-240-110-105-90         | A       | S8                         | III           |
|         | <b>L18</b>                                                   | 510-240-110-105-90         | A       | S9                         | III           |
|         | <b>L58, L63, L53, L54, L61</b>                               | 510-240-110-105-90         | A       | S10                        | III           |
|         | <b>L57, L62, L60</b>                                         | 510-240-110-105-90         | A       | S11                        | III           |
| M4      | <b>L43</b>                                                   | 313-305-246-110-100-90     | B       | Singleton                  | I             |
|         | <b>L42, L44</b>                                              | 313-305-246-110-100-90     | B       | S4                         | III           |
|         | <b>L46</b>                                                   | 313-305-246-110-100-90     | B       | Singleton                  | III           |
|         | <b>L30, L28, L29, L27, L26, L33, L38, L37, L39, L24, L25</b> | 510-240-110-105-91         | A       | S5                         | III           |
|         | <b>L36, L47, L45, L35, L40, L41</b>                          | 510-240-110-105-91         | A       | S6                         | III           |
|         |                                                              | 510-240-110-105-91         | A       | S7                         | III           |

|               |                    |   |     |     |
|---------------|--------------------|---|-----|-----|
| <b>L31</b>    | 510-240-110-105-91 | A | S11 | III |
| L32, L34, L48 | 510-240-110-105-91 | A | S12 | III |

---

Restriction fragments were determined by simultaneously cutting 1500bp-long 16S rRNA gene amplicons with the endonucleases *AluI* and *MspI*. Fragments lower than 70 bp were omitted from the restriction analysis. Major clusters and subclusters were defined through (GTG)<sub>5</sub> rep-PCR analysis using 50 and 80.2% of similarity as cut-off values, respectively. Strains in bold were submitted to 16S rRNA gene sequencing.

**Table S3.** 16S rRNA gene sequencing results and BLAST search on NCBI RefSeq database (16S ribosomal RNA nucleotide sequence records for Bacteria and Archaea).

| Sample | Strain code | Accession number | BLASTn search best hit |                 |         |              | Description                                    |
|--------|-------------|------------------|------------------------|-----------------|---------|--------------|------------------------------------------------|
|        |             |                  | Max Score              | Query cover (%) | E-value | Identity (%) |                                                |
| M1     | L7          | OL314786         | 2651                   | 100             | 0.0     | 100          | <i>L. plantarum</i> NRRL B-14768 (NR_104573.1) |
|        | L89         | OL314807         | 2651                   | 100             | 0.0     | 100          | <i>L. plantarum</i> NRRL B-14768 (NR_104573.1) |
|        | L82         | OL314804         | 2651                   | 100             | 0.0     | 100          | <i>L. plantarum</i> NRRL B-14768 (NR_104573.1) |
|        | L83         | OL314803         | 2651                   | 100             | 0.0     | 100          | <i>L. plantarum</i> NRRL B-14768 (NR_104573.1) |
|        | L97         | OL314809         | 2651                   | 100             | 0.0     | 100          | <i>L. plantarum</i> NRRL B-14768 (NR_104573.1) |
|        | L94         | OL314808         | 2651                   | 100             | 0.0     | 100          | <i>L. plantarum</i> NRRL B-14768 (NR_104573.1) |
|        | L88         | OL314806         | 2651                   | 100             | 0.0     | 100          | <i>L. plantarum</i> NRRL B-14768 (NR_104573.1) |
| M2     | L76         | OL314801         | 2651                   | 100             | 0.0     | 100          | <i>L. plantarum</i> NRRL B-14768 (NR_104573.1) |
|        | L15         | OL314790         | 2651                   | 100             | 0.0     | 100          | <i>L. plantarum</i> NRRL B-14768 (NR_104573.1) |
|        | L81         | OL314803         | 2761                   | 100             | 0.0     | 100          | <i>L. rhamnosus</i> NBRC 3525(NR_113332.1)     |
|        | L10         | OL314788         | 2604                   | 99              | 0.0     | 99.86        | <i>L. brevis</i> DSM20054 (NR_116238.1)        |
|        | L14         | OL314789         | 2651                   | 100             | 0.0     | 100          | <i>L. plantarum</i> NRRL B-14768 (NR_104573.1) |
|        | L68         | OL314799         | 2604                   | 99              | 0.0     | 99.86        | <i>L. brevis</i> DSM20054 (NR_116238.1)        |
|        | L79         | OL314802         | 2604                   | 99              | 0.0     | 99.86        | <i>L. brevis</i> DSM20054 (NR_116238.1)        |
|        | L70         | OL314800         | 2651                   | 100             | 0.0     | 100          | <i>L. plantarum</i> NRRL B-14768 (NR_104573.1) |
| M3     | L21         | OL314792         | 2604                   | 99              | 0.0     | 99.86        | <i>L. brevis</i> DSM20054 (NR_116238.1)        |
|        | L22         | OL314793         | 2604                   | 99              | 0.0     | 99.86        | <i>L. brevis</i> DSM20054 (NR_116238.1)        |
|        | L20         | OL314791         | 2604                   | 99              | 0.0     | 99.86        | <i>L. brevis</i> DSM20054 (NR_116238.1)        |
|        | L49         | OL314797         | 2651                   | 100             | 0.0     | 100          | <i>L. plantarum</i> NRRL B-14768 (NR_104573.1) |
|        | L52         | OL314798         | 2651                   | 100             | 0.0     | 100          | <i>L. plantarum</i> NRRL B-14768 (NR_104573.1) |
| M4     | L42         | OL314796         | 2651                   | 100             | 0.0     | 100          | <i>L. plantarum</i> NRRL B-14768 (NR_104573.1) |
|        | L30         | OL314794         | 2604                   | 99              | 0.0     | 99.86        | <i>L. brevis</i> DSM20054 (NR_116238.1)        |
|        | L31         | OL314795         | 2604                   | 99              | 0.0     | 99.86        | <i>L. brevis</i> DSM20054 (NR_116238.1)        |

**Table S4.** Overview of the ITS restriction patterns of sourdough yeast isolates.

| Sample | Strain                                                                                                                               | Amplicon | Restriction profile |              | Yeast-id Best matching                                                         | Pattern code |
|--------|--------------------------------------------------------------------------------------------------------------------------------------|----------|---------------------|--------------|--------------------------------------------------------------------------------|--------------|
|        |                                                                                                                                      |          | <i>HaeIII</i>       | <i>HinfI</i> |                                                                                |              |
| M1     | Y1, Y2, Y3, Y8, Y12, Y66, <b>Y67</b> ,<br>Y68, Y69, Y71, Y72, Y73, Y74,<br>Y75, Y76, Y77, Y78, Y79                                   | 620      | 620                 | 310-300      | <i>W. anomalus</i> (100%)                                                      | A            |
|        | <b>Y23</b>                                                                                                                           | 880      | 325-230-170-125     | 375-365-110  | <i>S. cerevisiae</i> (100%)                                                    | B            |
|        | Y70                                                                                                                                  | 800      | 800                 | 410-380      | <i>T. delbrueckii</i> (100%)                                                   | C            |
|        |                                                                                                                                      |          |                     |              |                                                                                |              |
| M2     | Y53, Y54, Y55, <b>Y58</b> , <b>Y26</b>                                                                                               | 880      | 325-230-170-125     | 375-365-110  | <i>S. cerevisiae</i> (100%)                                                    | B            |
|        | Y10, Y13, Y22, Y56, Y57, Y59,<br><b>Y60</b> , Y61, Y62, Y63, Y64, Y65                                                                | 620      | 620                 | 310-300      | <i>W. anomalus</i> (100%)                                                      | A            |
|        | <b>Y5</b>                                                                                                                            | 700      | 700                 | 320-200-150  | <i>C. boidinii</i> (73%)                                                       | D            |
|        |                                                                                                                                      |          |                     |              |                                                                                |              |
| M3     | Y14, Y24, Y25, Y46                                                                                                                   | 620      | 620                 | 310-300      | <i>W. anomalus</i> (100%)                                                      | A            |
|        | <b>Y7</b> , Y9                                                                                                                       | 450      | 350-100             | 310-310      | <i>C. ethanolica</i> (83%)                                                     | E            |
|        | <b>Y47</b> , <b>Y51</b>                                                                                                              | 800      | 800                 | 410-380      | <i>T. delbrueckii</i> (100%)                                                   | C            |
|        | <b>Y21</b> , <b>Y40</b> , Y41, Y42, Y43, Y44,<br>Y48, Y49, Y50, Y52,                                                                 | 880      | 325-230-170-125     | 375-365-110  | <i>S. cerevisiae</i> (100%)                                                    | B            |
|        |                                                                                                                                      |          |                     |              |                                                                                |              |
| M4     | Y16, Y20, Y39                                                                                                                        | 620      | 620                 | 310-300      | <i>W. anomalus</i> (100%)                                                      | A            |
|        | <b>Y15</b> , <b>Y17</b> , <b>Y18</b> , <b>Y19</b> , <b>Y27</b> , Y28,<br>Y29, <b>Y30</b> , Y31, Y32, Y33, Y34,<br>Y35, Y36, Y37, Y38 | 880      | 325-230-170-125     | 375-365-110  | <i>S. cerevisiae</i> (100%)                                                    | B            |
|        |                                                                                                                                      |          |                     |              |                                                                                |              |
|        | <b>Y6</b> , Y11                                                                                                                      | 630      | 420-130-80          | 310-310      | <i>C. maritima</i> (100%)/ <i>C. zeylanoides</i> / <i>C. diddensiae</i> (100%) | F            |

Tentative yeast identification was obtained by using ITS restriction patterns as queries in Yeast ID databases ([www.yeast-id.org](http://www.yeast-id.org)). Strains in bold were submitted to sequencing of the 26S rDNA D1/D2 domain. All the fragment sizes are in bp. Fragments lower than 70 bp were omitted from the analysis.

**Table S5.** 26S rRNA D1/D2 region sequencing results and BLAST search on NCBI RefSeq database (28S ribosomal RNA Nucleotide sequence records).

| ITS PCR-RFLP<br>Pattern | Strain | Accession number | BLASTn search   |         |              |                                                      |
|-------------------------|--------|------------------|-----------------|---------|--------------|------------------------------------------------------|
|                         |        |                  | Query cover (%) | E-value | Identity (%) | Best Hits                                            |
| A                       | Y1     | MN058031         | 100             | 0.0     | 100          | <i>W. anomalus</i> strain CBS5759 (MK394130.1)       |
|                         | Y67    | MZ221134         | 100             | 0.0     | 100          | <i>W. anomalus</i> strain CBS5759 (MH545921.1)       |
|                         | Y56    | MZ221130         | 100             | 0.0     | 100          | <i>W. anomalus</i> strain CBS5759 (MH545921.1)       |
|                         | Y59    | MZ221132         | 100             | 0.0     | 100          | <i>W. anomalus</i> strain CBS5759 (MH545921.1)       |
|                         | Y60    | MZ221133         | 100             | 0.0     | 100          | <i>W. anomalus</i> strain CBS5759 (MH545921.1)       |
| B                       | Y15    | MN058035         | 100             | 0.0     | 100          | <i>S. cerevisiae</i> strain CEN.PK113-7D (CP0460921) |
|                         | Y17    | MN058036         | 100             | 0.0     | 100          | <i>S. cerevisiae</i> strain CEN.PK113-7D (CP0460921) |
|                         | Y18    | MN058037         | 100             | 0.0     | 100          | <i>S. cerevisiae</i> strain CEN.PK113-7D (CP0460921) |
|                         | Y19    | MN058038         | 100             | 0.0     | 100          | <i>S. cerevisiae</i> strain CEN.PK113-7D (CP0460921) |
|                         | Y21    | MN058039         | 100             | 0.0     | 100          | <i>S. cerevisiae</i> strain CEN.PK113-7D (CP0460921) |
|                         | Y23    | MN058040         | 100             | 0.0     | 100          | <i>S. cerevisiae</i> strain CEN.PK113-7D (CP0460921) |
|                         | Y26    | MN058041         | 100             | 0.0     | 100          | <i>S. cerevisiae</i> strain CEN.PK113-7D (CP0460921) |
|                         | Y27    | MZ221124         | 100             | 0.0     | 100          | <i>S. cerevisiae</i> strain CEN.PK113-7D (CP0460921) |
|                         | Y30    | MZ221125         | 100             | 0.0     | 100          | <i>S. cerevisiae</i> strain CEN.PK113-7D (CP0460921) |
|                         | Y40    | MZ221126         | 100             | 0.0     | 100          | <i>S. cerevisiae</i> strain CEN.PK113-7D (CP0460921) |
|                         | Y50    | MZ221128         | 100             | 0.0     | 100          | <i>S. cerevisiae</i> strain CEN.PK113-7D (CP0460921) |
|                         | Y58    | MZ221131         | 100             | 0.0     | 100          | <i>S. cerevisiae</i> strain CEN.PK113-7D (CP0460921) |
| C                       | Y47    | MZ221127         | 99              | 0.0     | 100          | <i>T. delbrueckii</i> strain CBS2733 (KY109859.1)    |
|                         | Y51    | MZ221129         | 99              | 0.0     | 100          | <i>T. delbrueckii</i> strain CBS2733 (KY109859.1)    |
|                         | Y70    | MZ221135         | 99              | 0.0     | 100          | <i>T. delbrueckii</i> strain CBS2733 (KY109859.1)    |
| D                       | Y5     | MN058032         | 100             | 0.0     | 100          | <i>C. boidinii</i> strain CBS6202 (KY106345.1)       |
| E                       | Y7     | MN058034         | 100             | 0.0     | 100          | <i>P. kluyveri</i> strain CBS7275 (KY108826.1)       |
| F                       | Y6     | MN058033         | 100             | 0.0     | 100          | <i>C. diddensiae</i> strain CBS2214 (MK394116.1)     |
